# Supplementary material for: Highly reliable switching via phase transition using hydrogen peroxide in homogeneous and multi-layered GaZnOx-based resistive random access memory devices
Source: Royal Society of Chemistry journal article supplement (doi:10.1039/c4cc10209f), 2015-01-01
Supplement: c4cc10209f1.pdf [file c4cc10209f1.pdf]

## Supplementary Information for

### **Highly Reliable Switching via Phase Transition using Hydrogen Peroxide in Homogeneous and Multi-layered GaZnO<sub>x</sub>-based Resistive Random Access Memory**

*Sung Pyo Park, Doo Hyun Yoon, Young Jun Tak, Heesoo Lee, and Hyun Jae Kim\**

School of Electrical and Electronic Engineering,  
Yonsei University, 50 Yonsei-ro, Seodaemun-gu, Seoul 120-749, Republic of Korea. Fax:  
82-2-2123-8123; Tel: 82-2-2123-5865; E-mail: [hjk3@yonsei.ac.kr](mailto:hjk3@yonsei.ac.kr)

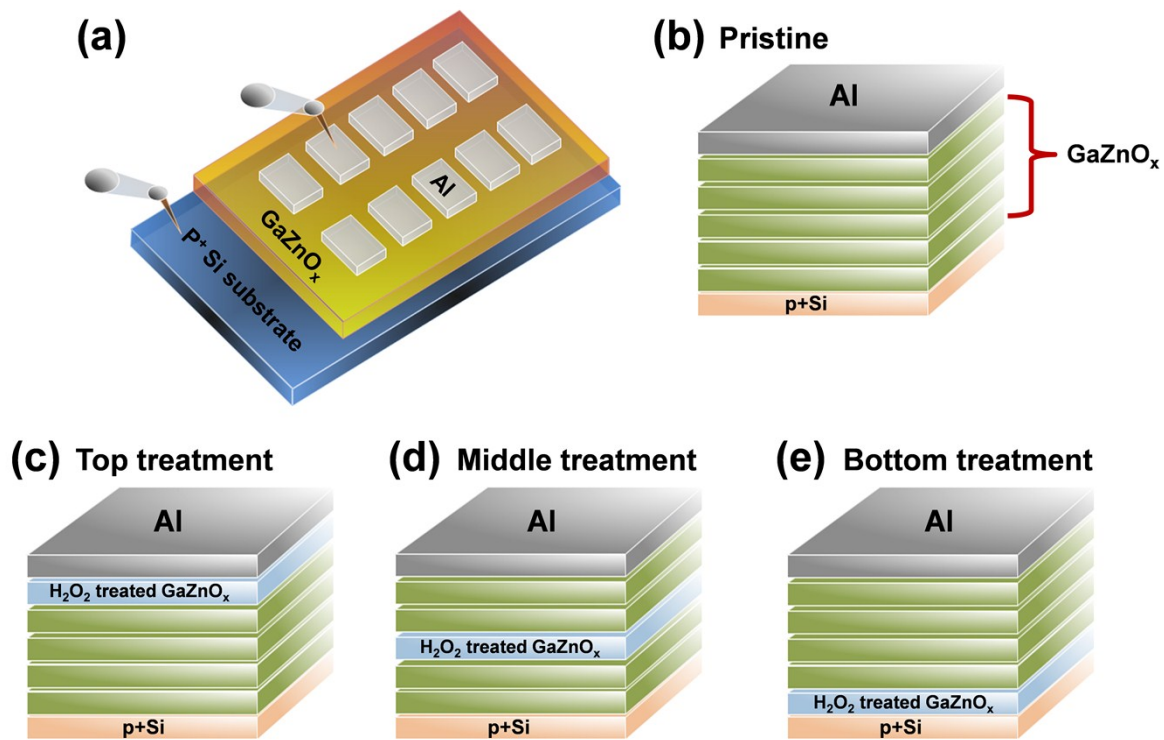

**Figure S1.** (a) The final schematic of the solution processed GaZnO<sub>x</sub> based RRAM device, and the illustration of treatment location for (b) pristine, (c) top treatment, (d) middle treatment, and (e) bottom treatment

A p<sup>+</sup>Si substrate was used for the bottom electrode of the RRAM devices as shown in Figure S1(a), and ultraviolet-assisted annealing was carried out for 15 min to induce hydrophilic behavior. For the switching layer, 0.5 M GaZnO<sub>x</sub> solution was synthesized using Zn acetate dihydrate and Ga nitrate hydrate using 2-methoxyethanol as a solvent. Mono-ethanolamine stabilizers and acetic acid were added dropwise to improve the solubility of the precursors and homogenize the GaZnO<sub>x</sub> solution, respectively. The synthesized compound was stirred for 1 h at 60°C, filtered through a 0.2-μm microfilter, and then aged for over 24 h in ambient air. To deposit the H<sub>2</sub>O<sub>2</sub> treatment layer, we mixed H<sub>2</sub>O<sub>2</sub> in synthesized GaZnO<sub>x</sub> solution. The solution was then deposited on a p<sup>+</sup>Si wafer using spin coating. To investigate the effect of H<sub>2</sub>O<sub>2</sub> deposition location on bipolar resistive switching (BRS) behavior, we prepared four experimental samples: pristine (Figure S1.(b)), top treatment (Figure S1.(c)), middle treatment (Figure. S1(d)) and bottom treatment (Figure. S1(e)). Spin coating was performed in five steps including H<sub>2</sub>O<sub>2</sub>-embedded GaZnO<sub>x</sub> solution to achieve optimized thickness. After each spin coating step, the GaZnO<sub>x</sub> thin film was prebaked at 300°C in air for 15 min to remove the solvent. A post-annealing step was then carried out at 500°C for 2 hours. The thickness of all GaZnO<sub>x</sub> layers is ~ 240nm. Lastly, 200-nm-thick Al was deposited to define the device area, a rectangle feature of 1000-μm (vertical) and 1500μm (horizontal), using a thermal evaporator. The electrical properties of the devices were analyzed at room temperature in darkness and air, using an HP 4156C semiconductor parameter analyzer.
